# Supplementary material for: Enhanced Skin Penetration of Cannabidiol Using Organosilane Particles as Transdermal Delivery Vehicles
Source: MDPI journal article supplement (doi:10.3390/pharmaceutics15030798), 2023-02-28
Supplement: s1 [file s1]

# Enhanced Skin Penetration of Cannabidiol Using Organosilane Particles as Transdermal Delivery Vehicles

Zahra Khabir, Connie Partalis, Jimit Vijay Panchal, Anand Deva, Aparajita Khatri and Alfonso Garcia-Bennett \*

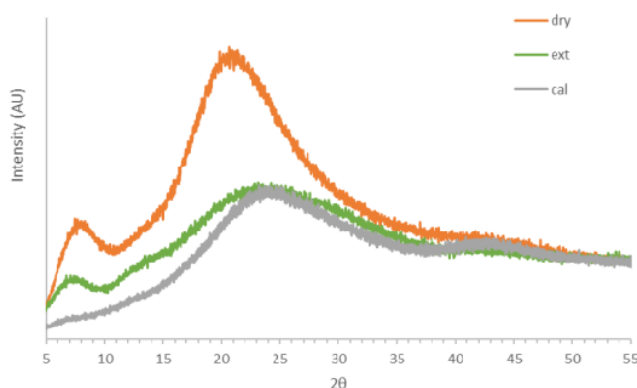

**Figure S1.** XRD analysis of the organosilica particles in their dried, calcined and extracted state with intensity of  $2\theta$ , Cu-K $\alpha$  radiation as X-Ray source.

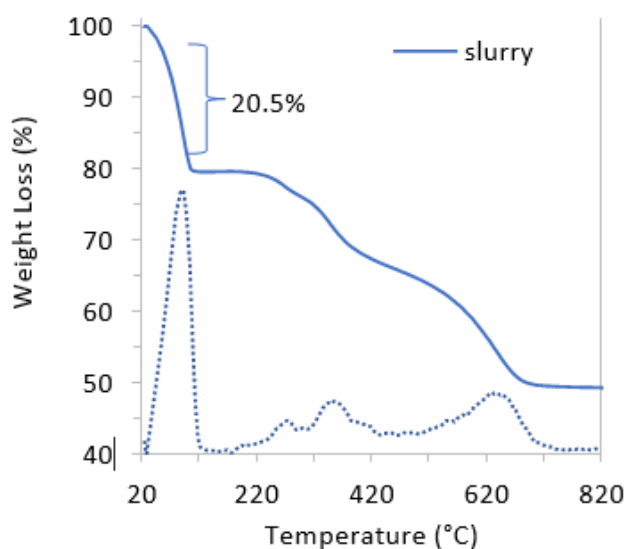

**Figure S2.** Thermogravimetric analysis of slurry CBD-Silica particles, containing 20wt% water. Doted lines correspond to the first derivative curves of the weight loss curves shown. Slurry samples show four distinct weight loss regions in, owing to; (I) removal of physically adsorbed water at 100 °C, (II) de-sorption of propylamine groups at 220-320 °C

corresponding to 3.1 wt%, (III) decomposition of CBD between 320-420 °C corresponding to a weigh loss of 9.7%, and (IV) decomposition of phenyl groups at 500-700 °C which is 17.2wt%.

**Table S1.** Elemental Microanalysis (CHN analysis) of CBD-Silica particles. Values are expressed as grams of element per 100 grams of sample. For organic standard materials the trueness 95% confidence limit of the technique is  $\pm 0.3\%$  with a precision of  $\pm 0.2\%$ . Analysis conducted after complete extraction of the CBD.

| Sample    | C%    | H%    | N%   |
|-----------|-------|-------|------|
| Slurry    | 39.07 | 4.648 | 3.49 |
| Extracted | 48.32 | 5.978 | 2.54 |
| Dried     | 30.25 | 7.7   | 1.51 |

**Table S2.** Components of the dissolution media.

| Name of the fluids | Components (for 2L)                                                              | pH  | Solubility of CBD (after 48 hours) |
|--------------------|----------------------------------------------------------------------------------|-----|------------------------------------|
| SIF                | 13.61g potassium phosphate monobasic and sodium hydroxide to reach pH            | 6.8 | > 10 %                             |
| SGF                | 4g sodium chloride and hydrochloric acid to reach pH                             | 1.2 | > 10 %                             |
| SSW                | 10g sodium chloride, 1g urea, 2ml lactic acid and ammonium hydroxide to reach pH | 6.6 | < 50 %                             |

SIF – Simulated intestine fluid; SGF – Simulated gastric fluid; SSW – Simulated sweat.

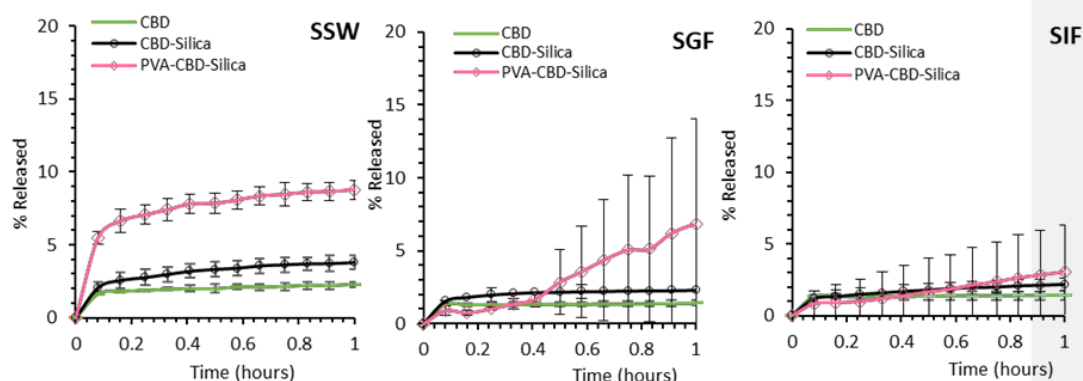

**Figure S3.** Release experiments in simulated fluids for CBD formulations showing the relative differences in the solubility of the PVA film (as a function of CBD release) in the first hour of contact in media.

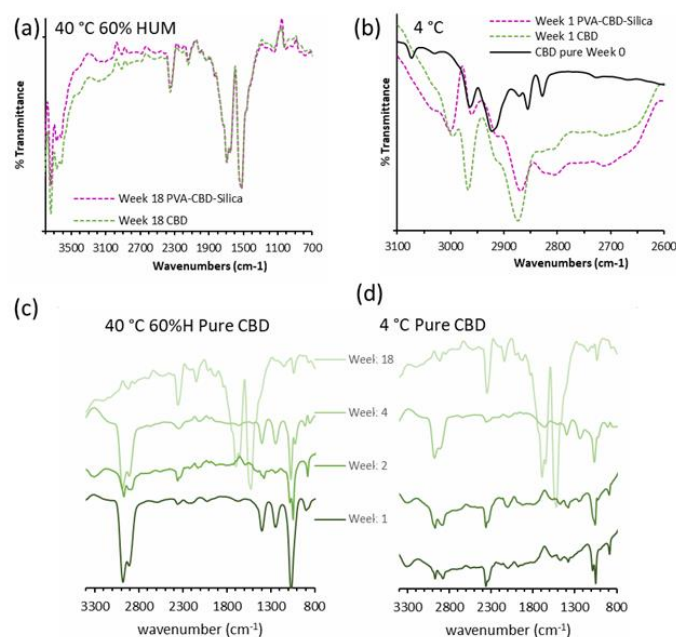

**Figure S4.** (a) FT-IR of Week 18 samples of pure CBD and CBD extracted from the PVA-CBD-Silica. (b) FT-IR of pure CBD and CBD extracted from the PVA-CBD-Silica at week 1 of storage in 4°C highlighting the loss of the peak at 3070  $\text{cm}^{-1}$ . For comparison pure CBD at week 0 is also shown. (c) Time dependence of the FT-IR spectra of pure CBD at 4 °C and 40 °C 60% humidity.

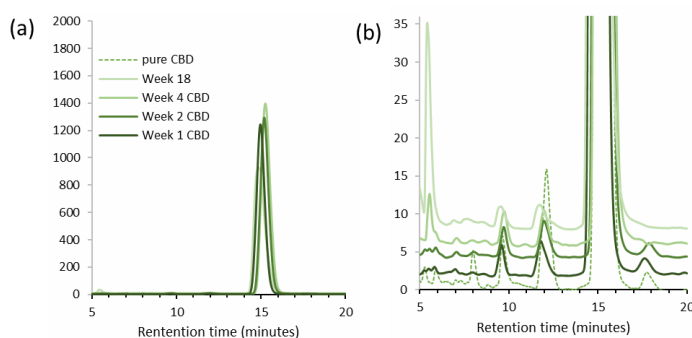

**Figure S5.** (a) HPLC peaks for pure CBD store at 40 °C and 60% humidity. (b) the inset shows the formation of additional peaks after Week 1 which remain relatively constant throughout the degradation period. After Week 4 an additional peak at 5 mins is seen, which increases significantly at week 18.
